# Supplementary material for: Alzheimer’s, Parkinson’s Disease and Amyotrophic Lateral Sclerosis Gene Expression Patterns Divergence Reveals Different Grade of RNA Metabolism Involvement
Source: Int J Mol Sci. 2020 Dec 14;21(24):9500. doi: 10.3390/ijms21249500 (PMC7765024; doi:10.3390/ijms21249500)
Supplement: Supplementary file 1 [file ijms-21-09500-s001.xlsx]

## Sheet: SALS_DE
Differentially expressed genes in SALS group respect to healty controls. Gene name and measured log2FC are reported for each transcript. Only transcripts with with |log2(disease sample/healthy control)|≥1 and a FDR ≤ 0.1 are sown. In rtPCR validation column, validation tissue is reported for selected transcripts.
Gene name	log2FC	rtPCR validation
LOC729987	3.79581	validated in PBMC
ADAM1A	2.76619
RP11-475I24.8	2.47099
RP11-38M8.1	2.45075
OR2B11	2.34872
LOC440173	2.31805
CCDC85C	2.28478
RP11-526A4.1	2.28408
SPON1	2.25241
TMEM236	2.22897
RP11-553L6.5	2.12828
RGAG4	2.07315
PGM5P2	2.07179
PSIP1	2.01335
LINC00943	1.97289
RP11-463J17.1	1.9718
RIC1	1.90298
RP11-210K20.2	1.89908
TDH	1.86614
CTD-2260A17.1	1.86084
SMURF1	1.82395
RP11-404F10.2	1.80878
AC010136.2	1.80714
CCT6P3	1.80105
RP11-458D21.6	1.7888
CTC-428H11.2	1.77592
RP1-232P20.1	1.75222
AC009950.2	1.74681
BRAT1	1.71019
RP11-190J23.1	1.70593
RP11-25K21.1	1.69485
RP11-455F5.5	1.69187
CTD-2235H24.2	1.69026
LOC100507557	1.67483
OR2A1-AS1	1.66911
CTC-559E9.8	1.6625
RP1-193H18.3	1.66024
RP11-267N12.1	1.65424
RP11-324O2.3	1.65351
L3MBTL3	1.64202
RP11-463D19.1	1.63551
RP11-78F17.1	1.6312
PLN	1.63057
E2F3	1.61581
ZNF503-AS1	1.60595
RP11-102L12.2	1.59702
RP11-362A9.3	1.59553
MAK	1.5931
AC104655.2	1.58912
LINC00854	1.58606
CTC-559E9.5	1.56947
SERPINB9P1	1.56817
CTD-3064M3.4	1.55604
RP5-1007M22.2	1.55356
CTD-2583P5.3	1.55197
CTB-113D17.1	1.5424
RP11-333E1.1	1.53599
RP11-669E14.6	1.53582
RP11-91I20.3	1.52648
RP11-65J3.2	1.51869
RP11-1105O14.1	1.51592
RP4-657D16.3	1.51563
RP11-526I2.1	1.51094
TCOF1	1.51094
LINC00854	1.50572
TP73-AS1	1.50445
CTD-2050N2.1	1.50192
CTD-2015H6.3	1.49472
RP11-509E16.1	1.48939
RP11-10N23.4	1.48835
AC005606.14	1.48799
RASAL2-AS1	1.48765
AC109828.1	1.48453
AC004067.5	1.4781
RP6-74O6.2	1.47699
RP11-932O9.8	1.47524
RP11-1109M24.5	1.47479
C5orf56	1.47245
RP11-686D22.9	1.46975
RP11-493L12.3	1.46966
AL450226.2	1.46129
RP11-190D6.2	1.45551
RP11-42O15.3	1.45433
SLC22A5	1.45211
RNF157-AS1	1.44784
RP11-782C8.4	1.44677
RP11-417B4.2	1.44472
MBNL1-AS1	1.44342
RP11-521D12.1	1.44139
AC104809.2	1.44114
RP13-270P17.1	1.43945
DPYD-AS2	1.43876
AP000593.7	1.43765
RP11-267C16.1	1.42541
RP11-214O1.3	1.42439
RP11-839G9.1	1.4235
RAI1-AS1	1.42297
RP11-727F15.12	1.41916
F2RL2	1.41907
LINC00484	1.418
NAIP	1.41644
MARCH1	1.41494
SH3D19	1.41491
AC012065.7	1.41447
RP11-353N4.1	1.40974
CDC42-IT1	1.4096
RP5-1024G6.2	1.40887
CTB-176F20.3	1.40352
RP11-554D20.1	1.39946
SLC26A1	1.39547
TTC28	1.39325
RP11-133I21.2	1.39295
RP11-613C6.2	1.39237
CTD-2587H19.2	1.39152
CTD-2213F21.2	1.39098
AD001527.7	1.39056
RP11-958J22.1	1.38994
RP11-667K14.3	1.37685
RP11-256L6.3	1.36811
AE000661.37	1.36209
SDCBP2-AS1	1.36138
MIR133A1	1.35716
RP11-5C23.1	1.35493
RP11-53B2.4	1.35323
LINC01011	1.35223
RP11-66B24.2	1.35214
RP11-48O20.4	1.35176
RP11-417J8.3	1.35052
RP5-1074L1.4	1.34784
RP11-100M12.2	1.34776
RP11-702H23.6	1.34578
CD27-AS1	1.34537
RP11-384P7.5	1.34524
ATG10-AS1	1.34425
RP11-296A18.6	1.33925
AC079807.2	1.33175
PDCD1	1.3279
RAPH1	1.32773
RP13-228J13.1	1.32543
LINC00152	1.32479
RP5-951N9.1	1.32339
RP11-616K22.2	1.32114
INTS6-AS1	1.32102
RP11-124N3.2	1.32095
RP4-601P9.2	1.32052
AP001432.14	1.32007
RP11-405A12.2	1.31869
RP11-462L8.1	1.31859
RP11-735B13.2	1.31694
RP11-15M15.1	1.3158
CTB-193M12.3	1.31339
AC078883.4	1.31323
RP11-383C5.3	1.3127
AC006960.7	1.30757
RP11-55K22.5	1.30509
CTD-2541M15.1	1.29598
C2orf88	1.29116
RP11-218E20.5	1.29077
RP11-435B5.5	1.28609
CTD-2008P7.1	1.28013
MIR29B1	1.27787
NFE2L2	1.27407
RP11-262H14.1	1.26951
RP11-343N15.2	1.26316
LINC00963	1.25999
AC009950.2	1.25277
AC004448.5	1.25118
SCRN3	1.24963
RP11-545I5.3	1.24905
RP11-798G7.5	1.24655
RP11-531A24.3	1.24208
ACVR2A	1.24013
CTD-2540B15.10	1.2389
RP4-569M23.2	1.23355
AC007250.4	1.23176
AC093818.1	1.23125
RP11-156P1.3	1.23123
RP11-473O4.4	1.23007
TMLHE-AS1	1.22917
RP11-532M24.1	1.22884
RP11-67K19.3	1.22719
RP11-38L15.8	1.22134
CTB-193M12.1	1.21547
YEATS2-AS1	1.20579
RP4-598G3.1	1.2041
RP11-1186N24.5	1.20246
RP11-261C10.5	1.20219
SLC1A4	1.19583
RHOQ	1.19151
RP1-67K17.4	1.18931
MCM3AP-AS1	1.18475
CTD-2236F14.1	1.18466
EML4	1.1836
CTD-2583P5.1	1.18144
RP11-219B17.1	1.17589
RP11-96K19.2	1.17324
RP5-973N23.4	1.17259
CDC42EP3	1.16653
FPR3	1.15931
POU2F2	1.15868
RP11-49K24.8	1.15221
BABAM1	1.14784
UHRF1	1.14119
ATP8B1	1.13904
LIFR-AS1	1.13743
RP5-1142A6.2	1.13509
RP11-53B2.5	1.12813
RP4-693M11.3	1.11819
MYO5B	1.11102
KATNAL2	1.11019
EFCAB13	1.10313
RP11-84E24.3	1.09598
CNP	1.09203
LINC00620	1.08721
AC004906.3	1.08089
TTC25	1.07993
RP11-727A23.5	1.07504
AP000487.5	1.06926
CTD-2349P21.9	1.06537
CHRNE	1.06434
CTB-189B5.3	1.06425
AC002550.5	1.06305
RP11-799B12.2	1.06199
TAF1C	1.06198
ESRP2	1.06094
RP11-886P16.6	1.05697
RP11-483P21.2	1.05547
FHOD1	1.0551
GS1-114I9.1	1.05462
MPV17L	1.05228
RP3-368A4.5	1.05153
LINC01044	1.04968
RP11-767I20.1	1.02317
RP11-426C22.4	1.02178
RP11-855A2.3	1.01662
C16orf89	1.01523
UBN1	1.01086
RP13-638C3.4	1.0044
CTB-4E7.1	1.00362
VASN	1.00222
ADCY9	-1.00046
RP11-24J19.1	-1.00047
GPR65	-1.00579
PTGER2	-1.01018
AIRN	-1.01455
SMG7-AS1	-1.01748
CTB-31O20.6	-1.0201
TAPT1-AS1	-1.02978
RP11-184E9.1	-1.04659
TRIM13	-1.04796
ZC3H13	-1.0493
RP11-540B6.6	-1.05047
TPCN1	-1.05517	validated in PBMC
ADORA2A-AS1	-1.05916
RP11-473I1.5	-1.06473
RP11-257P3.3	-1.0743
RP11-378A13.2	-1.0794
USP3-AS1	-1.09521
CTD-2369P2.8	-1.0962
RP11-47A8.5	-1.09848
RP11-280O1.2	-1.09954
SH2B3	-1.10003
NAPA-AS1	-1.10707
GOLGA2P5	-1.10783
ANKS1B	-1.15012
TMPO-AS1	-1.15194
RP11-498D10.5	-1.15479
CTC-250I14.6	-1.16498
LINC00641	-1.17618
RBM26-AS1	-1.17659
PA2G4	-1.17706
CTC-436P18.1	-1.17768
RP11-146F11.1	-1.17909
IDI2-AS1	-1.1853
RP11-395E19.7	-1.19258
LINC00174	-1.19661
VIM-AS1	-1.19808
RP1-59D14.1	-1.20096
AC009303.1	-1.20562
CTD-2139B15.2	-1.20999
RP11-182L21.6	-1.2158
PRH2	-1.21956
RP1-100J12.1	-1.22276
CTD-2267D19.2	-1.22817
A2M	-1.23348
VAMP1	-1.23404
C11orf65	-1.23859
UBXN7-AS1	-1.25021
CTD-3065J16.9	-1.26568
HLA-F-AS1	-1.27101
CTB-31O20.4	-1.27382
RP11-77H9.8	-1.28626
AP001053.11	-1.28777
RP4-800J21.3	-1.30341
EAF1-AS1	-1.30985
LINC00426	-1.31919
RP11-661A12.5	-1.3199
RP13-452N2.1	-1.3205
USP35	-1.32864
RP11-638I2.9	-1.32964
CTC-250I14.6	-1.33376
RELA	-1.34121
RP11-59O6.3	-1.34272
RP11-1100L3.8	-1.34524
MAP3K14	-1.34614
RP11-468E2.5	-1.35786
CTD-3193O13.13	-1.36725
RP11-338H14.1	-1.37323
CTD-2382E5.4	-1.37536
AC010096.1	-1.37602
RP11-386G11.5	-1.37701
EAF1-AS1	-1.38855
AF127577.11	-1.39119
RP11-350N15.5	-1.39453
AC015971.2	-1.39852
RP11-489E7.4	-1.40742
CTD-2561J22.5	-1.42324
RP11-500C11.3	-1.42523
U47924.31	-1.42856
RP3-402G11.27	-1.43893
XXbac-B461K10.4	-1.4544
CTD-2623N2.11	-1.45839
AC012487.2	-1.47445
CTD-2540B15.7	-1.47727
RP13-582O9.5	-1.48064
RP11-356I2.4	-1.50171
ASH1L-AS1	-1.51015
RP5-1071N3.1	-1.51313
RP5-1120P11.1	-1.52181
CSNK1G2-AS1	-1.52638
AHNAK	-1.53597
AF127577.10	-1.53758
CTB-31O20.9	-1.54058
RP11-1191J2.4	-1.56228
RP3-329E20.2	-1.5721
RP4-536B24.2	-1.57341
RP1-257A7.4	-1.57913
RP11-796E2.4	-1.57977
DLGAP1-AS2	-1.59483
RP11-161H23.9	-1.60881
RNU12	-1.61948
AC068580.6	-1.62772
CTC-425F1.4	-1.62945
AC004019.13	-1.635
RP11-442H21.2	-1.65413
CTD-2184D3.5	-1.66048
RP11-809N8.2	-1.6886
AP000442.1	-1.72484
TMEM132A	-1.73526
RP11-666A8.9	-1.75688
RP11-126O1.5	-1.77466
RP11-87F15.2	-1.77687
RP4-781K5.2	-1.77837
RP11-420G6.4	-1.82729
AC105402.4	-1.83628
AC142528.1	-1.85542
RP1-125I3.2	-1.89057
AC114730.8	-1.93259
SPON1	-1.95684
CTD-2292P10.4	-1.97496
LINC00528	-1.98185
KMT2E-AS1	-1.98506
ENTPD7	-2.03451
PDSS1	-2.0383
CTB-50L17.5	-2.10504
OPN3	-2.12812
CTA-384D8.35	-2.13777
ZBTB11-AS1	-2.14451
TAF5L	-2.20588
LOC400794	-2.31879
XXbac-BPG252P9.10	-2.34962
CTB-58E17.1	-2.35401
ZEB1-AS1	-2.40039
TTC25	-2.47471
TTF2	-2.5194
MYCBP	-2.66791	validated in PBMC
ZMYM6	-2.71644
HDAC1	-2.71729	validated in PBMC
SPATA21	-2.91531
KIAA2013	-3.08598	validated in PBMC

## Sheet: AD_DE
Differentially expressed genes in AD group respect to healty controls. Gene name and measured log2FC are reported for each transcript. Only transcripts with with |log2(disease sample/healthy control)|≥1 and a FDR ≤ 0.1 are sown. In rtPCR validation column, validation tissue is reported for selected transcripts.
Gene name	log2FC	rtPCR validation
CH507-513H4.4	3.13681
CH507-513H4.6	3.13681
CH507-513H4.3	3.13681
NCF1	1.88407
ITGA2B	1.49008
F13A1	1.36566
TYMP	1.24603
HCK	1.16192
VCL	1.15834	validated in PBMC
PYGL	1.08904
TLN1	1.06768	validated in PBMC
SNORA53	-1.019
RPL29	-1.03277
RPS23	-1.0385
NDUFV2	-1.1208
SPOCK2	-1.12585
CEBPZ	-1.14635
RPS5	-1.25487
S1PR1	-1.41166
MTRNR2L8	-4.21504	validated in PBMC
MTRNR2L10	-4.94499
MTRNR2L1	-5.40952	validated in PBMC
MTRNR2L6	-5.84963

## Sheet: PD_DE
Differentially expressed genes in PD group respect to healty controls. Gene name and measured log2FC are reported for each transcript. Only transcripts with with |log2(disease sample/healthy control)|≥1 and a FDR ≤ 0.1 are sown. In rtPCR validation column, validation tissue is reported for selected transcripts.
Gene name	log2FC	rtPCR validation
SCARNA2	8.19864	validated in PBMC
RP1-29C18.8	-1.38826
RP1-29C18.9	-1.77486	validated in PBMC
SNORD57	-3.75131
TBC1D3	-6.16846	validated in PBMC
